# Supplementary material
Source: Springer Nature journal article supplement (https://www.springermedizin.de/resource/supplementary/12889_2010_2657_MOESM7_ESM.pdf/9486912)

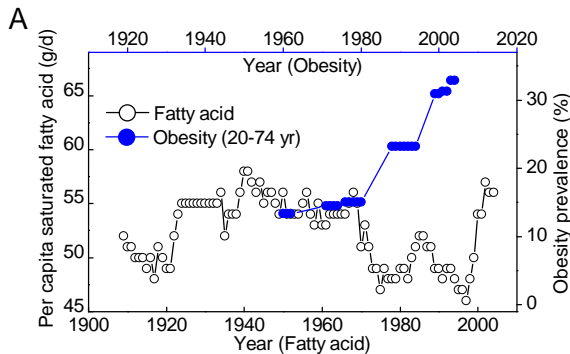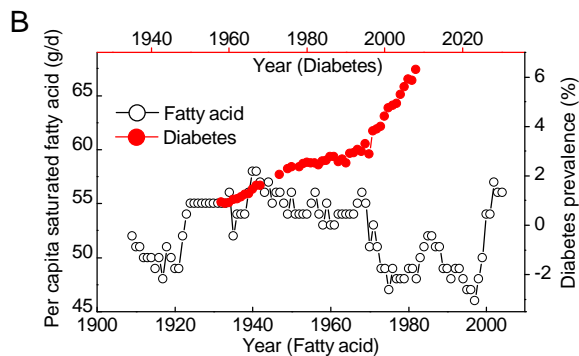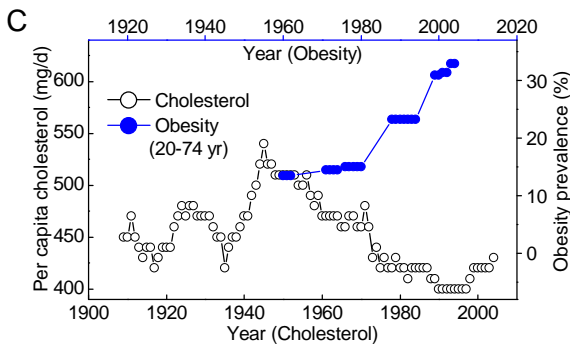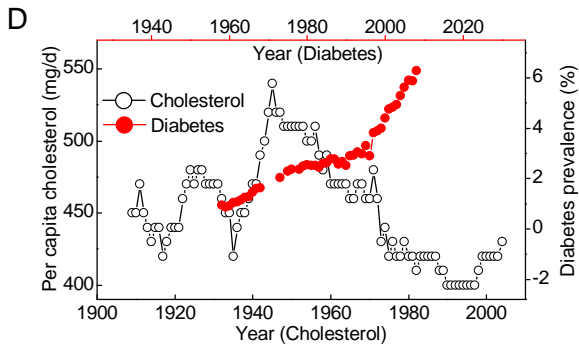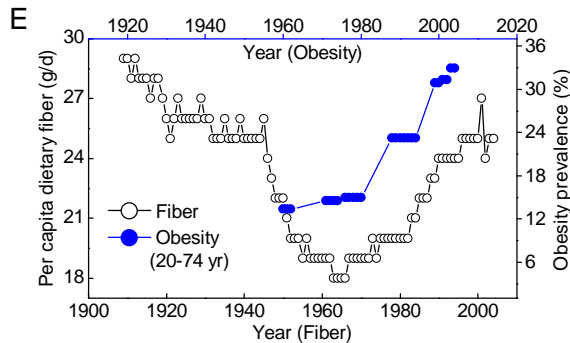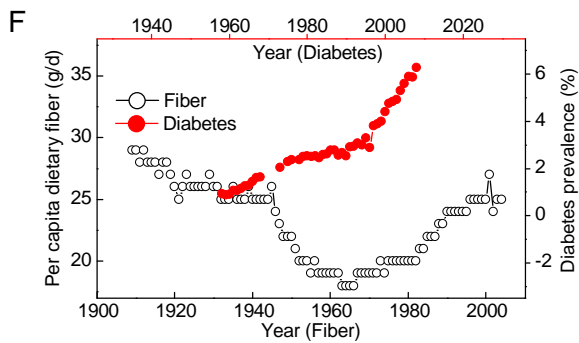

Supplement: MOESM7 [file 9486912]
